# Supplementary material
Source: PubMed Central journal article supplement (PMC7965112)
Supplement: 3303_materials.pdf [file 3303_materials.pdf]

## On-line Appendix

### Results

#### *Control Values*

The control values displayed a significant change with time in 3 regions, as shown in On-line Table 5. In the left thalamus and the left caudate nucleus, a significant decrease in mean MTR was seen; in the right putamen, a significant increase in mean MTR was observed. To ensure that our most significant longitudinal finding, namely MTR peak height of the right putamen, was not affected by the potential influence of calibration, we also examined the difference with time of this value without calibration to controls. As expected, the MTR peak height from the right putamen in the premanifest far from onset group also displayed a very significant ( $P = .005$ ) increase during the 2-year follow-up.

#### *Premanifest versus Manifest in 4 Group Division*

When the 2 premanifest and 2 manifest groups were combined, there were 6 noteworthy increases: the MTR peak height of the right putamen ( $P = .010$ ), MTR peak height of the left pallidum ( $P = .001$ ), MTR peak height of cortical gray matter ( $P = .024$ ), mean MTR of the left amygdala ( $P = .024$ ), and mean MTR of the right thalamus ( $P = .048$ ). Furthermore, a decrease was seen in mean MTR of the left caudate nucleus ( $P = .030$ ); and in the manifest HD group, the left and right amygdalae showed a decrease in mean MTR (left amygdala,  $P = .042$ ; right amygdala,  $P = .025$ ). However, when the Bonferroni correction for multiple testing was applied, only the increase in MTR peak height of the left pallidum remained statistically significant.

**On-line Table 1: MTI-derived values in 14 different regions on both baseline and follow-up visit for the premanifest HD A and premanifest HD B group**

|                      | Premanifest A |       |           |       | P                  | Premanifest B |       |           |       | P                 |
|----------------------|---------------|-------|-----------|-------|--------------------|---------------|-------|-----------|-------|-------------------|
|                      | Baseline      |       | Follow-Up |       |                    | Baseline      |       | Follow-Up |       |                   |
|                      | Mean          | SD    | Mean      | SD    |                    | Mean          | SD    | Mean      | SD    |                   |
| White matter         |               |       |           |       |                    |               |       |           |       |                   |
| Peak height          | 1.144         | 0.161 | 1.176     | 0.223 | .567               | 1.092         | 0.258 | 1.188     | 0.134 | .172              |
| Mean MTR             | 0.387         | 0.013 | 0.389     | 0.010 | .249               | 0.388         | 0.017 | 0.388     | 0.010 | .903              |
| Cortical gray matter |               |       |           |       |                    |               |       |           |       |                   |
| Peak height          | 0.752         | 0.107 | 0.796     | 0.109 | .091               | 0.685         | 0.136 | 0.727     | 0.111 | .152              |
| Mean MTR             | 0.326         | 0.014 | 0.329     | 0.013 | .079               | 0.325         | 0.012 | 0.319     | 0.013 | .020 <sup>a</sup> |
| Caudate right        |               |       |           |       |                    |               |       |           |       |                   |
| Peak height          | 0.852         | 0.133 | 0.910     | 0.184 | .320               | 0.849         | 0.182 | 0.838     | 0.169 | .804              |
| Mean MTR             | 0.339         | 0.018 | 0.346     | 0.020 | .049 <sup>a</sup>  | 0.333         | 0.031 | 0.340     | 0.025 | .353              |
| Caudate left         |               |       |           |       |                    |               |       |           |       |                   |
| Peak height          | 0.974         | 0.245 | 1.046     | 0.085 | .367               | 0.964         | 0.199 | 1.013     | 0.146 | .480              |
| Mean MTR             | 0.357         | 0.021 | 0.351     | 0.016 | .308               | 0.359         | 0.024 | 0.346     | 0.022 | .062              |
| Putamen right        |               |       |           |       |                    |               |       |           |       |                   |
| Peak height          | 1.132         | 0.235 | 1.375     | 0.206 | 0.003 <sup>a</sup> | 1.338         | 0.354 | 1.409     | 0.241 | .396              |
| Mean MTR             | 0.329         | 0.015 | 0.335     | 0.012 | .160               | 0.330         | 0.031 | 0.334     | 0.021 | .312              |
| Putamen left         |               |       |           |       |                    |               |       |           |       |                   |
| Peak height          | 1.291         | 0.199 | 1.340     | 0.181 | .614               | 1.298         | 0.314 | 1.433     | 0.295 | .091              |
| Mean MTR             | 0.352         | 0.013 | 0.356     | 0.015 | .119               | 0.353         | 0.031 | 0.356     | 0.024 | .494              |
| Pallidum right       |               |       |           |       |                    |               |       |           |       |                   |
| Peak height          | 1.569         | 0.333 | 1.740     | 0.272 | .112               | 1.617         | 0.318 | 1.701     | 0.285 | .400              |
| Mean MTR             | 0.381         | 0.006 | 0.382     | 0.007 | .740               | 0.382         | 0.021 | 0.387     | 0.013 | .300              |
| Pallidum left        |               |       |           |       |                    |               |       |           |       |                   |
| Peak height          | 1.471         | 0.285 | 1.721     | 0.218 | .032 <sup>a</sup>  | 1.528         | 0.310 | 1.709     | 0.223 | .086              |
| Mean MTR             | 0.386         | 0.010 | 0.386     | 0.009 | .958               | 0.383         | 0.019 | 0.392     | 0.013 | .094              |
| Thalamus right       |               |       |           |       |                    |               |       |           |       |                   |
| Peak height          | 1.013         | 0.139 | 1.083     | 0.159 | .142               | 1.003         | 0.204 | 0.999     | 0.167 | .946              |
| Mean MTR             | 0.359         | 0.015 | 0.367     | 0.018 | .047 <sup>a</sup>  | 0.352         | 0.028 | 0.359     | 0.021 | .398              |
| Thalamus left        |               |       |           |       |                    |               |       |           |       |                   |
| Peak height          | 1.166         | 0.279 | 1.197     | 0.098 | .717               | 1.116         | 0.222 | 1.196     | 0.167 | .332              |
| Mean MTR             | 0.372         | 0.018 | 0.380     | 0.014 | .090               | 0.371         | 0.020 | 0.375     | 0.020 | .467              |
| Amygdala right       |               |       |           |       |                    |               |       |           |       |                   |
| Peak height          | 1.297         | 0.116 | 1.405     | 0.191 | .050 <sup>a</sup>  | 1.259         | 0.327 | 1.279     | 0.240 | .837              |
| Mean MTR             | 0.357         | 0.017 | 0.358     | 0.011 | .817               | 0.364         | 0.027 | 0.351     | 0.019 | .164              |
| Amygdala left        |               |       |           |       |                    |               |       |           |       |                   |
| Peak height          | 1.530         | 0.190 | 1.613     | 0.212 | .236               | 1.304         | 0.231 | 1.486     | 0.325 | .064              |
| Mean MTR             | 0.374         | 0.016 | 0.370     | 0.015 | .506               | 0.377         | 0.026 | 0.364     | 0.018 | .200              |
| Hippocampus right    |               |       |           |       |                    |               |       |           |       |                   |
| Peak height          | 1.346         | 0.219 | 1.298     | 0.224 | .586               | 1.164         | 0.266 | 1.198     | 0.288 | .637              |
| Mean MTR             | 0.360         | 0.015 | 0.363     | 0.009 | .635               | 0.365         | 0.021 | 0.355     | 0.017 | .124              |
| Hippocampus left     |               |       |           |       |                    |               |       |           |       |                   |
| Peak height          | 1.010         | 0.195 | 1.059     | 0.170 | .558               | 0.888         | 0.188 | 1.088     | 0.197 | .037 <sup>a</sup> |
| Mean MTR             | 0.381         | 0.022 | 0.387     | 0.018 | .347               | 0.380         | 0.018 | 0.373     | 0.013 | .317              |
| Whole brain          |               |       |           |       |                    |               |       |           |       |                   |
| Peak height          | 0.923         | 0.123 | 0.963     | 0.141 | .198               | 0.864         | 0.181 | 0.936     | 0.094 | .118              |
| Mean MTR             | 0.352         | 0.013 | 0.355     | 0.011 | .110               | 0.353         | 0.013 | 0.350     | 0.010 | .297              |

<sup>a</sup> Significant finding at  $P < .05$ .

**On-line Table 2: MTI-derived values in 14 different regions on both baseline and follow-up visit for the manifest HD 1 and manifest HD 2 group**

|                      | Manifest 1 |       |           |       | <i>P</i>          | Manifest 2 |       |           |       | <i>P</i>          |
|----------------------|------------|-------|-----------|-------|-------------------|------------|-------|-----------|-------|-------------------|
|                      | Baseline   |       | Follow-Up |       |                   | Baseline   |       | Follow-Up |       |                   |
|                      | Mean       | SD    | Mean      | SD    |                   | Mean       | SD    | Mean      | SD    |                   |
| White matter         |            |       |           |       |                   |            |       |           |       |                   |
| Peak height          | 0.747      | 0.274 | 0.824     | 0.243 | .388              | 0.866      | 0.263 | 0.916     | 0.245 | .560              |
| Mean MTR             | 0.372      | 0.025 | 0.384     | 0.013 | .121              | 0.380      | 0.016 | 0.379     | 0.014 | .713              |
| Cortical gray matter |            |       |           |       |                   |            |       |           |       |                   |
| Peak height          | 0.589      | 0.174 | 0.587     | 0.137 | .961              | 0.602      | 0.127 | 0.632     | 0.097 | .239              |
| Mean MTR             | 0.319      | 0.014 | 0.316     | 0.015 | .264              | 0.311      | 0.017 | 0.311     | 0.013 | .928              |
| Caudate right        |            |       |           |       |                   |            |       |           |       |                   |
| Peak height          | 0.726      | 0.234 | 0.704     | 0.182 | .762              | 0.777      | 0.204 | 0.703     | 0.200 | .371              |
| Mean MTR             | 0.331      | 0.034 | 0.344     | 0.039 | .321              | 0.323      | 0.034 | 0.339     | 0.032 | .123              |
| Caudate left         |            |       |           |       |                   |            |       |           |       |                   |
| Peak height          | 0.784      | 0.240 | 0.798     | 0.156 | .852              | 0.833      | 0.244 | 0.898     | 0.236 | .311              |
| Mean MTR             | 0.339      | 0.045 | 0.338     | 0.045 | .930              | 0.346      | 0.039 | 0.346     | 0.037 | .999              |
| Putamen right        |            |       |           |       |                   |            |       |           |       |                   |
| Peak height          | 0.877      | 0.326 | 1.018     | 0.287 | .152              | 0.961      | 0.282 | 1.082     | 0.334 | .221              |
| Mean MTR             | 0.330      | 0.029 | 0.338     | 0.024 | .276              | 0.329      | 0.018 | 0.323     | 0.029 | .455              |
| Putamen left         |            |       |           |       |                   |            |       |           |       |                   |
| Peak height          | 0.941      | 0.332 | 1.037     | 0.178 | .415              | 1.029      | 0.295 | 1.177     | 0.275 | .106              |
| Mean MTR             | 0.346      | 0.026 | 0.352     | 0.031 | .720              | 0.360      | 0.015 | 0.353     | 0.033 | .348              |
| Pallidum right       |            |       |           |       |                   |            |       |           |       |                   |
| Peak height          | 1.178      | 0.466 | 1.325     | 0.359 | .203              | 1.307      | 0.409 | 1.356     | 0.394 | .714              |
| Mean MTR             | 0.396      | 0.039 | 0.389     | 0.018 | .565              | 0.384      | 0.021 | 0.394     | 0.019 | .146              |
| Pallidum left        |            |       |           |       |                   |            |       |           |       |                   |
| Peak height          | 1.138      | 0.366 | 1.240     | 0.211 | .321              | 1.237      | 0.364 | 1.370     | 0.282 | .268              |
| Mean MTR             | 0.376      | 0.047 | 0.396     | 0.026 | .237              | 0.399      | 0.012 | 0.392     | 0.023 | .308              |
| Thalamus right       |            |       |           |       |                   |            |       |           |       |                   |
| Peak height          | 0.825      | 0.297 | 0.826     | 0.208 | .988              | 0.874      | 0.234 | 0.838     | 0.205 | .667              |
| Mean MTR             | 0.349      | 0.035 | 0.360     | 0.038 | .396              | 0.335      | 0.042 | 0.358     | 0.028 | .079              |
| Thalamus left        |            |       |           |       |                   |            |       |           |       |                   |
| Peak height          | 0.884      | 0.311 | 0.901     | 0.183 | .856              | 0.933      | 0.285 | 0.993     | 0.280 | .477              |
| Mean MTR             | 0.346      | 0.054 | 0.367     | 0.045 | .230              | 0.354      | 0.044 | 0.373     | 0.038 | .214              |
| Amygdala right       |            |       |           |       |                   |            |       |           |       |                   |
| Peak height          | 1.076      | 0.366 | 1.100     | 0.336 | .875              | 1.131      | 0.277 | 1.080     | 0.325 | .536              |
| Mean MTR             | 0.361      | 0.019 | 0.333     | 0.029 | .036 <sup>a</sup> | 0.351      | 0.024 | 0.349     | 0.017 | .686              |
| Amygdala left        |            |       |           |       |                   |            |       |           |       |                   |
| Peak height          | 1.128      | 0.344 | 1.298     | 0.388 | .102              | 1.198      | 0.265 | 1.121     | 0.228 | .434              |
| Mean MTR             | 0.377      | 0.042 | 0.345     | 0.036 | .157              | 0.369      | 0.020 | 0.354     | 0.015 | .022 <sup>a</sup> |
| Hippocampus right    |            |       |           |       |                   |            |       |           |       |                   |
| Peak height          | 0.974      | 0.264 | 0.976     | 0.233 | .994              | 1.097      | 0.235 | 0.948     | 0.249 | .131              |
| Mean MTR             | 0.372      | 0.036 | 0.344     | 0.022 | .073              | 0.354      | 0.027 | 0.359     | 0.018 | .576              |
| Hippocampus Left     |            |       |           |       |                   |            |       |           |       |                   |
| Peak height          | 0.717      | 0.226 | 0.798     | 0.181 | .142              | 0.957      | 0.256 | 1.062     | 0.232 | .350              |
| Mean MTR             | 0.394      | 0.045 | 0.364     | 0.029 | .150              | 0.389      | 0.017 | 0.379     | 0.020 | .284              |
| Whole brain          |            |       |           |       |                   |            |       |           |       |                   |
| Peak height          | 0.661      | 0.217 | 0.696     | 0.184 | .579              | 0.719      | 0.174 | 0.762     | 0.153 | .428              |
| Mean MTR             | 0.343      | 0.016 | 0.347     | 0.014 | .098              | 0.342      | 0.016 | 0.343     | 0.012 | .728              |

<sup>a</sup> Significant finding at  $P < .05$ .

**On-line Table 3: Volumetric analysis of 14 brain regions in premanifest HD<sup>a</sup>**

|                   | Premanifest A |       |           |       | <i>P</i>          | Premanifest B |       |           |       | <i>P</i>          |
|-------------------|---------------|-------|-----------|-------|-------------------|---------------|-------|-----------|-------|-------------------|
|                   | Baseline      |       | Follow-Up |       |                   | Baseline      |       | Follow-Up |       |                   |
|                   | Mean          | SD    | Mean      | SD    |                   | Mean          | SD    | Mean      | SD    |                   |
| Caudate right     | 3.907         | 0.428 | 3.705     | 0.482 | .004              | 3.897         | 0.339 | 3.739     | 0.353 | .001 <sup>b</sup> |
| Caudate left      | 3.797         | 0.395 | 3.651     | 0.406 | .001 <sup>b</sup> | 3.713         | 0.359 | 3.576     | 0.376 | .002 <sup>b</sup> |
| Putamen right     | 4.832         | 0.619 | 4.680     | 0.603 | .009              | 4.582         | 0.497 | 4.397     | 0.525 | .001 <sup>b</sup> |
| Putamen left      | 4.916         | 0.502 | 4.748     | 0.544 | .006              | 4.681         | 0.556 | 4.483     | 0.586 | .002 <sup>b</sup> |
| Pallidum right    | 2.056         | 0.173 | 2.069     | 0.207 | .555              | 2.009         | 0.155 | 1.952     | 0.142 | .067              |
| Pallidum left     | 1.931         | 0.205 | 1.890     | 0.226 | .199              | 1.995         | 0.134 | 1.925     | 0.175 | .081              |
| Thalamus right    | 8.155         | 0.545 | 8.122     | 0.468 | .566              | 7.718         | 0.637 | 7.595     | 0.741 | .044              |
| Thalamus left     | 8.492         | 0.595 | 8.452     | 0.554 | .474              | 7.833         | 0.659 | 7.777     | 0.722 | .382              |
| Amygdala right    | 1.689         | 0.242 | 1.672     | 0.222 | .821              | 1.799         | 0.268 | 1.793     | 0.306 | .891              |
| Amygdala left     | 1.772         | 0.266 | 1.752     | 0.259 | .578              | 1.711         | 0.229 | 1.733     | 0.234 | .626              |
| Hippocampus right | 5.519         | 0.385 | 5.411     | 0.431 | .033              | 5.204         | 0.470 | 5.252     | 0.619 | .497              |
| Hippocampus left  | 5.315         | 0.358 | 5.392     | 0.319 | .034              | 4.925         | 0.750 | 4.962     | 0.853 | .552              |
| White matter      | 673.9         | 36.2  | 667.2     | 34.0  | .028              | 647.2         | 46.2  | 637.0     | 44.4  | .014              |
| Whole brain       | 1486.4        | 38.7  | 1477.3    | 33.2  | .208              | 1445.7        | 72.9  | 1429.0    | 73.4  | .036              |

<sup>a</sup> Volumes (cubic millimeters) of 14 VOIs on both baseline and follow-up.

<sup>b</sup> Significant finding after Bonferroni correction ( $P < .0033$ ).

**On-line Table 4: Volumetric analysis of 14 brain regions in manifest HD<sup>a</sup>**

|                   | Manifest 1 |       |           |       | <i>P</i>          | Manifest 2 |       |           |       | <i>P</i>          |
|-------------------|------------|-------|-----------|-------|-------------------|------------|-------|-----------|-------|-------------------|
|                   | Baseline   |       | Follow-Up |       |                   | Baseline   |       | Follow-Up |       |                   |
|                   | Mean       | SD    | Mean      | SD    |                   | Mean       | SD    | Mean      | SD    |                   |
| Caudate right     | 3.290      | 0.530 | 3.165     | 0.621 | .046              | 3.302      | 0.495 | 3.223     | 0.624 | .219              |
| Caudate left      | 3.178      | 0.478 | 3.002     | 0.481 | .019              | 3.094      | 0.472 | 2.916     | 0.515 | .001 <sup>b</sup> |
| Putamen right     | 4.002      | 0.603 | 3.839     | 0.602 | .009              | 3.518      | 0.325 | 3.296     | 0.392 | .012              |
| Putamen left      | 4.176      | 0.548 | 3.962     | 0.593 | .004              | 3.455      | 0.479 | 3.285     | 0.437 | .003 <sup>b</sup> |
| Pallidum right    | 1.834      | 0.086 | 1.790     | 0.058 | .029              | 1.845      | 0.248 | 1.751     | 0.226 | .014              |
| Pallidum left     | 1.866      | 0.207 | 1.793     | 0.201 | .117              | 1.769      | 0.288 | 1.679     | 0.324 | .141              |
| Thalamus right    | 7.603      | 0.703 | 7.427     | 0.661 | .003 <sup>b</sup> | 7.285      | 0.593 | 7.207     | 0.435 | .352              |
| Thalamus left     | 7.745      | 0.729 | 7.567     | 0.728 | .001 <sup>b</sup> | 7.358      | 0.897 | 7.176     | 0.892 | .018              |
| Amygdala right    | 1.643      | 0.258 | 1.732     | 0.194 | .257              | 1.623      | 0.149 | 1.633     | 0.279 | .918              |
| Amygdala left     | 1.654      | 0.311 | 1.676     | 0.357 | .707              | 1.638      | 0.106 | 1.594     | 0.115 | .295              |
| Hippocampus right | 5.127      | 0.511 | 5.063     | 0.374 | .354              | 4.961      | 0.579 | 4.807     | 0.578 | .018              |
| Hippocampus left  | 5.096      | 0.591 | 5.033     | 0.556 | .557              | 4.542      | 0.440 | 4.446     | 0.550 | .233              |
| White matter      | 632.9      | 52.9  | 619.4     | 53.9  | .001 <sup>b</sup> | 633.8      | 35.8  | 616.1     | 34.8  | .009              |
| Whole brain       | 1396.6     | 95.3  | 1371.9    | 93.8  | .001 <sup>b</sup> | 1383.1     | 77.8  | 1350.6    | 81.4  | .001 <sup>b</sup> |

<sup>a</sup> Volumes (cubic millimeters) of 14 VOIs on both baseline and follow-up.

<sup>b</sup> Significant finding after Bonferroni correction ( $P < .0033$ ).

**On-line Table 5: Control values of MTR parameters**

| Control Group ( <i>n</i> = 25) |                 |           | Mean               | SD    |
|--------------------------------|-----------------|-----------|--------------------|-------|
| White matter                   | MTR peak height | Baseline  | 1.109              | 0.220 |
|                                |                 | Follow-up | 1.125              | 0.231 |
|                                | Mean MTR        | Baseline  | 0.391              | 0.012 |
|                                |                 | Follow-up | 0.394              | 0.012 |
| Cortical gray matter           | MTR peak height | Baseline  | 0.769              | 0.119 |
|                                |                 | Follow-up | 0.735              | 0.132 |
|                                | Mean MTR        | Baseline  | 0.329              | 0.013 |
|                                |                 | Follow-up | 0.330              | 0.014 |
| Caudate nucleus right          | MTR peak height | Baseline  | 0.799              | 0.192 |
|                                |                 | Follow-up | 0.830              | 0.224 |
|                                | Mean MTR        | Baseline  | 0.349              | 0.026 |
|                                |                 | Follow-up | 0.343              | 0.025 |
| Caudate nucleus left           | MTR peak height | Baseline  | 0.892              | 0.188 |
|                                |                 | Follow-up | 0.831              | 0.198 |
|                                | Mean MTR        | Baseline  | 0.369              | 0.018 |
|                                |                 | Follow-up | 0.354 <sup>a</sup> | 0.018 |
| Putamen right                  | MTR peak height | Baseline  | 1.257              | 0.372 |
|                                |                 | Follow-up | 1.240              | 0.271 |
|                                | Mean MTR        | Baseline  | 0.340              | 0.019 |
|                                |                 | Follow-up | 0.351 <sup>a</sup> | 0.017 |
| Putamen left                   | MTR peak height | Baseline  | 1.337              | 0.268 |
|                                |                 | Follow-up | 1.266              | 0.265 |
|                                | Mean MTR        | Baseline  | 0.360              | 0.015 |
|                                |                 | Follow-up | 0.357              | 0.016 |
| Pallidum right                 | MTR peak height | Baseline  | 1.494              | 0.343 |
|                                |                 | Follow-up | 1.435              | 0.230 |
|                                | Mean MTR        | Baseline  | 0.382              | 0.015 |
|                                |                 | Follow-up | 0.388              | 0.014 |
| Pallidum left                  | MTR peak height | Baseline  | 1.601              | 0.301 |
|                                |                 | Follow-up | 1.490              | 0.268 |
|                                | Mean MTR        | Baseline  | 0.386              | 0.014 |
|                                |                 | Follow-up | 0.388              | 0.014 |
| Thalamus right                 | MTR peak height | Baseline  | 0.988              | 0.261 |
|                                |                 | Follow-up | 0.936              | 0.236 |
|                                | Mean MTR        | Baseline  | 0.369              | 0.021 |
|                                |                 | Follow-up | 0.350              | 0.021 |
| Thalamus left                  | MTR peak height | Baseline  | 1.067              | 0.226 |
|                                |                 | Follow-up | 1.003              | 0.251 |
|                                | Mean MTR        | Baseline  | 0.383              | 0.020 |
|                                |                 | Follow-up | 0.368 <sup>a</sup> | 0.016 |
| Amygdala right                 | MTR peak height | Baseline  | 1.329              | 0.295 |
|                                |                 | Follow-up | 1.287              | 0.289 |
|                                | Mean MTR        | Baseline  | 0.360              | 0.020 |
|                                |                 | Follow-up | 0.363              | 0.025 |
| Amygdala left                  | MTR peak height | Baseline  | 1.475              | 0.307 |
|                                |                 | Follow-up | 1.328              | 0.369 |
|                                | Mean MTR        | Baseline  | 0.370              | 0.021 |
|                                |                 | Follow-up | 0.370              | 0.026 |
| Hippocampus right              | MTR peak height | Baseline  | 1.240              | 0.309 |
|                                |                 | Follow-up | 1.194              | 0.273 |
|                                | Mean MTR        | Baseline  | 0.366              | 0.019 |
|                                |                 | Follow-up | 0.371              | 0.020 |
| Hippocampus left               | MTR peak height | Baseline  | 0.981              | 0.247 |
|                                |                 | Follow-up | 0.929              | 0.222 |
|                                | Mean MTR        | Baseline  | 0.386              | 0.015 |
|                                |                 | Follow-up | 0.391              | 0.017 |
| Whole brain                    | MTR peak height | Baseline  | 0.917              | 0.152 |
|                                |                 | Follow-up | 0.906              | 0.156 |
|                                | Mean MTR        | Baseline  | 0.356              | 0.011 |
|                                |                 | Follow-up | 0.359              | 0.012 |

<sup>a</sup> Significant finding after Bonferroni correction ( $P < .0033$ ).
